# Supplementary material for: The Development of a One-Step RT-qPCR for the Detection and Quantification of Viable Forms of Trypanosoma cruzi in Açai Samples from Areas at Risk of Chagas Disease through Oral Transmission
Source: MDPI journal article supplement (doi:10.3390/ijms25105531), 2024-05-18
Supplement: s1 [file s1]

**Table S1.** Ct values for the Comparison of parasite load quantified using *T. cruzi* DNA and RNA in açai pulp samples after bleaching.

| Sample               | DNA                          |           |                              |           | RNA                          |           |                              |           |
|----------------------|------------------------------|-----------|------------------------------|-----------|------------------------------|-----------|------------------------------|-----------|
|                      | <i>Ct Mean<br/>(Sat-DNA)</i> | <i>SD</i> | <i>Ct Mean<br/>(exo-IPC)</i> | <i>SD</i> | <i>Ct Mean<br/>(Sat-DNA)</i> | <i>SD</i> | <i>Ct Mean<br/>(RNA-IAC)</i> | <i>SD</i> |
| <b>Day 0 (4°C)</b>   | 35.85                        | 0.12      | 31.72                        | 0.35      | NA                           | NA        | 27.54                        | 0.67      |
| <b>Day 1 (4°C)</b>   | 40.22                        | 0.23      | 32.20                        | 0.17      | NA                           | NA        | 28.21                        | 0.35      |
| <b>Day 3 (4°C)</b>   | 38.23                        | 0.44      | 31.36                        | 0.26      | NA                           | NA        | 27.89                        | 0.24      |
| <b>Day 0 (-20°C)</b> | 33.99                        | 0.28      | 31.77                        | 0.29      | NA                           | NA        | 27.63                        | 0.28      |
| <b>Day 1 (-20°C)</b> | 39.71                        | 0.25      | 32.79                        | 0.33      | NA                           | NA        | 28.14                        | 0.51      |
| <b>Day 3 (-20°C)</b> | 39.11                        | 0.71      | 31.13                        | 0.06      | NA                           | NA        | 28.37                        | 0.29      |

Ct: Threshold Cycle. SD: Standard deviation.
